# Supplementary material
Source: Springer Nature journal article supplement (https://www.springermedizin.de/resource/supplementary/12888_2012_1414_MOESM1_ESM.pdf/9480184)
Supplement: MOESM1 [file 9480184]

July 2004 – Ongoing

**Baseline CATSS-9/12**

*Telephone screening interview*

n = 17 220 (January 2010)

(8787 boys and 8433 girls)

Consecutive birth cohorts born in Sweden from July 1992 and onwards

**Inclusion criteria:** screen-positive for NDPs (identified by the A-TAC inventory), siblings of screen-positive children (screen-negative co-twin), and random (screen-negative) controls  
860 children were eligible for CATSS-15/DOGSS (542 boys and 318 girls)

The 1993–1995 birth cohorts

**Follow-up CATSS-15/DOGSS**

*Clinical examination*

n = 452 (264 boys and 188 girls)

450 had completed the A-TAC interview:

247 screen-positive children

(144 boys and 103 girls)

157 screen-negative co-twins

(88 boys and 69 girls)

46 controls

(30 boys and 16 girls)

2005

2006

2007

2008

2009

2010

2011
